# Supplementary material for: 2DPCA fractal features and genetic algorithm for efficient face representation and recognition
Source: Springer Nature journal article supplement (doi:10.1186/1687-417x-2011-1), 2011-08-23

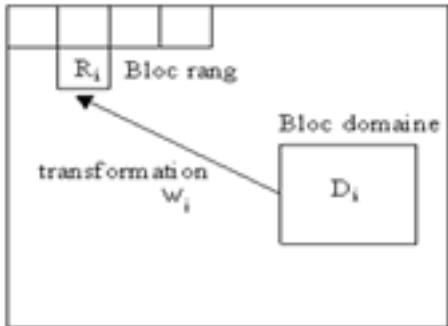

Supplement: 13635_2010_1_MOESM1_ESM.pdf [file 13635_2010_1_MOESM1_ESM.pdf]
