# Supplementary material for: 2DPCA fractal features and genetic algorithm for efficient face representation and recognition
Source: Springer Nature journal article supplement (doi:10.1186/1687-417x-2011-1), 2011-08-23
Supplement: 13635_2010_1_MOESM3_ESM.pdf [file 13635_2010_1_MOESM3_ESM.pdf]

Region 1

$X_{\text{Dom}}^1$

$Y_{\text{Dom}}^1$

Flip<sup>1</sup>

Region 2

$X_{\text{Dom}}^2$

$Y_{\text{Dom}}^2$

Flip<sup>2</sup>

⋮

⋮

⋮

Region N

$X_{\text{Dom}}^N$

$Y_{\text{Dom}}^N$

Flip<sup>N</sup>
