# Supplementary material for: 2DPCA fractal features and genetic algorithm for efficient face representation and recognition
Source: Springer Nature journal article supplement (doi:10.1186/1687-417x-2011-1), 2011-08-23
Supplement: 13635_2010_1_MOESM4_ESM.pdf [file 13635_2010_1_MOESM4_ESM.pdf]

Parent 1

$C^{P11}$   $C^{P12}$   $C^{P13}$

|             |             |                   |
|-------------|-------------|-------------------|
| $X_{Dom}^1$ | $Y_{Dom}^1$ | Flip <sup>1</sup> |
| $X_{Dom}^2$ | $Y_{Dom}^2$ | Flip <sup>2</sup> |
| ⋮           | ⋮           | ⋮                 |
| $X_{Dom}^N$ | $Y_{Dom}^N$ | Flip <sup>N</sup> |

Parent 2

$C^{P21}$   $C^{P22}$   $C^{P23}$

|             |             |                   |
|-------------|-------------|-------------------|
| $X_{Dom}^1$ | $Y_{Dom}^1$ | Flip <sup>1</sup> |
| $X_{Dom}^2$ | $Y_{Dom}^2$ | Flip <sup>2</sup> |
| ⋮           | ⋮           | ⋮                 |
| $X_{Dom}^N$ | $Y_{Dom}^N$ | Flip <sup>N</sup> |

Random  
value R

R=3

R=1

R=2

Offspring 1

|           |           |           |
|-----------|-----------|-----------|
| $C^{P11}$ | $C^{P22}$ | $C^{P23}$ |
|-----------|-----------|-----------|

Offspring 2

|           |           |           |
|-----------|-----------|-----------|
| $C^{P21}$ | $C^{P12}$ | $C^{P13}$ |
|-----------|-----------|-----------|

Offspring 1

|           |           |           |
|-----------|-----------|-----------|
| $C^{P21}$ | $C^{P12}$ | $C^{P23}$ |
|-----------|-----------|-----------|

Offspring 2

|           |           |           |
|-----------|-----------|-----------|
| $C^{P11}$ | $C^{P22}$ | $C^{P13}$ |
|-----------|-----------|-----------|

Offspring 1

|           |           |           |
|-----------|-----------|-----------|
| $C^{P21}$ | $C^{P22}$ | $C^{P13}$ |
|-----------|-----------|-----------|

Offspring 2

|           |           |           |
|-----------|-----------|-----------|
| $C^{P11}$ | $C^{P12}$ | $C^{P23}$ |
|-----------|-----------|-----------|
