# Supplementary material for: 2DPCA fractal features and genetic algorithm for efficient face representation and recognition
Source: Springer Nature journal article supplement (doi:10.1186/1687-417x-2011-1), 2011-08-23
Supplement: 13635_2010_1_MOESM5_ESM.pdf [file 13635_2010_1_MOESM5_ESM.pdf]

|                    |                    |                   |
|--------------------|--------------------|-------------------|
| $X_{\text{Dom}}^1$ | $Y_{\text{Dom}}^1$ | Flip <sup>1</sup> |
| $X_{\text{Dom}}^2$ | $Y_{\text{Dom}}^2$ | Flip <sup>2</sup> |
| ⋮                  | ⋮                  | ⋮                 |
| $X_{\text{Dom}}^N$ | $Y_{\text{Dom}}^N$ | Flip <sup>N</sup> |

R=1

R=3

R=2

|                      |                    |                   |
|----------------------|--------------------|-------------------|
| $\text{Rand}[0,L]^1$ | $Y_{\text{Dom}}^1$ | Flip <sup>1</sup> |
| $\text{Rand}[0,L]^2$ | $Y_{\text{Dom}}^2$ | Flip <sup>2</sup> |
| ⋮                    | ⋮                  | ⋮                 |
| $\text{Rand}[0,L]^N$ | $Y_{\text{Dom}}^N$ | Flip <sup>N</sup> |

|                    |                    |                      |
|--------------------|--------------------|----------------------|
| $X_{\text{Dom}}^1$ | $Y_{\text{Dom}}^1$ | $\text{Rand}[0,7]^1$ |
| $X_{\text{Dom}}^2$ | $Y_{\text{Dom}}^2$ | $\text{Rand}[0,7]^2$ |
| ⋮                  | ⋮                  | ⋮                    |
| $X_{\text{Dom}}^N$ | $Y_{\text{Dom}}^N$ | $\text{Rand}[0,7]^N$ |

|                    |                      |                   |
|--------------------|----------------------|-------------------|
| $X_{\text{Dom}}^1$ | $\text{Rand}[0,W]^1$ | Flip <sup>1</sup> |
| $X_{\text{Dom}}^2$ | $\text{Rand}[0,W]^2$ | Flip <sup>2</sup> |
| ⋮                  | ⋮                    | ⋮                 |
| $X_{\text{Dom}}^N$ | $\text{Rand}[0,W]^N$ | Flip <sup>N</sup> |
